# Supplementary material
Source: Elsevier journal article supplement (https://www.sciencedirect.com/science/article/pii/S0212656717308272)
Supplement: mmc1 [file S0212656717308272:mmc1.docx]

**Anexo 1: Modelo de planilla evaluativa con las habilidades trabajadas**

| **Tareas y Habilidades** | **5 hace**  **exahustivo** | **4 hace**  **claro** | **3 hace algo** | **2 hace dudoso** | **1 no hace** |
| --- | --- | --- | --- | --- | --- |
| **AVERIGUAR**  10 | excelente | destaca | promedio  aceptable | debo mejorar | debo mejorar mas |
| 1 Exploro sus conductas de salud (tratamientos, síntomas,…) y FR |  |  |  |  |  |
| **Diagnóstico para el cambio**  20 |  |  |  |  |  |
| 2 Exploro ideas/preocupaciones– sobre su comportamiento |  |  |  |  |  |
| 3 Exploro ideas/preocupaciones– sobre su motivacion para el cambio |  |  |  |  |  |
| **Habilidades 20** |  |  |  |  |  |
| 4 Evito redireccionar |  |  |  |  |  |
| 5 Hago preguntas abiertas |  |  |  |  |  |
| 6 Muestro empatía en los momentos adecuados (valido, legitimo) y manifiesto mi apoyo |  |  |  |  |  |
| 7 Realizo escucha reflexiva |  |  |  |  |  |
| 8 Hago Resúmenes |  |  |  |  |  |
| 9 Capacito/Fomento autoeficacia |  |  |  |  |  |
| **ACONSEJAR Ofrecer (compartir) la información 20** |  |  |  |  |  |
| 10 Pido permiso para aconsejar |  |  |  |  |  |
| 11 Personalizada (aconsejo acorde con la situación del paciente) |  |  |  |  |  |
| **ACORDAR-AYUDAR-ARREGLAR 20** |  |  |  |  |  |
| 12 Identifico barreras |  |  |  |  |  |
| 13 Exploro Recursos |  |  |  |  |  |
| 14 Ofrezco alguna estrategia adecuada |  |  |  |  |  |
| 15 Planifico seguimiento |  |  |  |  |  |
