# Supplementary material
Source: Elsevier journal article supplement (https://www.sciencedirect.com/science/article/pii/S0212656717308272)
Supplement: mmc2 [file S0212656717308272:mmc2.docx]

**Anexo 2: Modelo de encuesta para los estudiantes**

**Edad: NIF**

**Sexo:**  Hombre  Mujer

**1. Crees que la motivación para cambiar TU conducta se produce por iniciativa propia o por presiones externas? (es decir, ¿tienen su origen en nosotros o fuera de nosotros?)**

En nosotros (interno)  Fuera de nosotros (externo)

Ambas cosas influyen (interno y externo)

**2. Crees que la capacidad real de un médico para ayudar a los pacientes a seguir sus tratamientos/regímenes o a cambiar conductas de riesgo es**

Muy escasa (absolutamente irrelevante)

Escasa (secundaria, anecdótica)

Más bien escasa (probablemente pueda hacer algo)

Más bien alta (seguramente puede hacer algo)

Alta (relevante)

Muy alta (muy relevante)

**3. Después de la formación recibida y ante una situación en la que un paciente hace una elección que tu crees puede ser prejudicial para los objetivos que el/la mismo se plantea (no sigue el tratamiento, tiene una conducta de riesgo,…) te resultaría fácil respetar su autonomía:**

Totalmente en desacuerdo

En desacuerdo

Más bien en desacuerdo

Más bien de acuerdo

De acuerdo

Totalmente de acuerdo

**4. Ante una situación como la anterior señala un par de estrategias (conductas) que pondrías en práctica con un paciente de este tipo (¿Qué es lo que habitualmente harías para ello?)**

a) …………………………………………………………………………………………………………………………………………………………………………………………………………………………………………………………

b) …………………………………………………………………………………………………………………………………………………………………………………………………………………………………………………………

c) no encuentro ninguna

**5. Señala ahora alguna conducta que tratarías de no hacer:**

a) …………………………………………………………………………………………………………………………………………………………………………………………………………………………………………………………

b) no encuentro ninguna

**6. Después de la formación recibida y considerándolo globalmente, crees que en este momento tu capacitación para afrontar este tipo de situaciones (ayudar a un paciente a cambiar una conducta que le está perjudicando su salud) es :**

Muy mala

Mala

Mas bien mala

Aceptable

Buena

Muy buena
